# Supplementary material
Source: ML conference proceedings conference paper supplement (https://proceedings.mlr.press/v119/sabato20a.html)
Supplement: Supplementary file [file sabato20a-supp.pdf]

# Bounding the Fairness and Accuracy of Classifiers from Population Statistics

Sivan Sabato and Elad Yom-Tov  
ICML 2020

Supplementary Material

## A. Algorithm for Finding the Accuracy of a Fair Classifier

Alg. 2 gives the full algorithm for lower-bounding the error of a classifier which is known to be fair. Its time complexity is linear in  $|\mathcal{G}|$ .

**Algorithm 2** Lower-bounding the error of a classifier which is known to be fair

**Input:** Inputs  $\equiv (\{w_g\}, \{\pi_g^y\}, \{\hat{p}_g^y\})$  for a fair classifier

**Output:** A lower bound on the error of the classifier, or UNFAIR if the input is inconsistent with a fair classifier.

- 1: For  $g \in \mathcal{G}^+$ ,  $r_g \leftarrow 1 - \hat{p}_g^1/\pi_g^1$  and  $q_g \leftarrow 1/\pi_g^1 - 1$ .
- 2: Solve the following linear minimization problem:

$$\begin{aligned} \text{Minimize}_{\alpha_{\text{all}}^0, \alpha_{\text{all}}^1 \in [0,1]} \quad \text{error} &\equiv \sum_{y \in \mathcal{Y}} \alpha_{\text{all}}^y \sum_{g \in \mathcal{G}} w_g \pi_g^y \\ \text{such that} \\ \forall g \in \mathcal{G}^+, \quad \alpha_{\text{all}}^1 &= r_g + q_g \alpha_{\text{all}}^0 \\ \forall g \in \mathcal{G} \setminus \mathcal{G}^+, y \in \mathcal{Y} \text{ s.t. } \pi_g^y &= 1, \quad \alpha_{\text{all}}^y = 1 - \hat{p}_g^y. \end{aligned}$$

- 3: **if** no solution exists **then**
- 4:     **return** UNFAIR.
- 5: **else**
- 6:     **return** error =  $\sum_{y \in \mathcal{Y}} \alpha_{\text{all}}^y \sum_{g \in \mathcal{G}} w_g \pi_g^y$ .
- 7: **end if**

## B. Proof of Theorem 4.1

In this section, we prove Theorem 4.1. First, we show that minimizing  $\text{Obj}$  for a fixed  $\bar{\alpha}$  can be done using a small finite number of possibilities for each variable in  $\{\alpha_g^0\}_{g \in \mathcal{G}^+}$ .

**Lemma B.1.** *Let  $\text{Obj}$  be as defined in Eq. (7) and let  $\text{Obj}_2$  be as defined in Eq. (9). Then, for any  $\bar{\alpha} \in [0, 1]^2$ ,*

$$\text{Obj}_2(\bar{\alpha}) = \min_{\{\alpha_g^0 \in \text{dom}_g\}_{g \in \mathcal{G}^+}} \text{Obj}(\bar{\alpha}, \{\alpha_g^0\}_{g \in \mathcal{G}^+}).$$

*Proof.* Fix  $\bar{\alpha} \in [0, 1]^2$ . We show that there exists an assignment that minimizes  $\text{Obj}(\bar{\alpha}, \{\alpha_g^0\}_{g \in \mathcal{G}^+})$ , which satisfies  $\alpha_g^0 \in S_g(\bar{\alpha})$  for all  $g \in \mathcal{G}^+$ , where  $S_g$  is as defined in

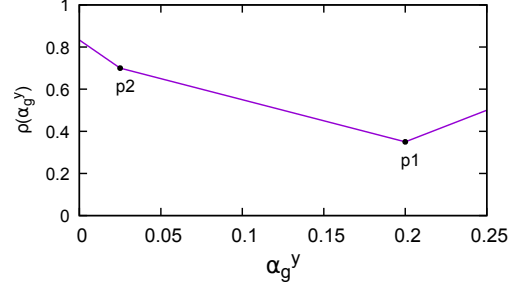

Figure 8.  $\rho(\alpha_g^y)$  and the inflection points  $p_1, p_2$  for  $\alpha^0 = 0.2, \alpha^1 = 0.6, \pi_g^1 = 0.1, \hat{p}_g^1 = 0.1$ .

Theorem 4.1. From the definition of  $\text{Obj}_2$ , this suffices to prove the claim.

From the definition of  $\text{Obj}$ , it suffices to show that for any fixed  $\bar{\alpha}$ ,  $\rho(\alpha_g^0) := \sum_y \pi_g^y \tau(\alpha^y, \alpha_g^y)$  is minimized by some  $\alpha_g^y \in S_g(\bar{\alpha})$ . Consider the function  $b \mapsto \tau(a, b)$  for a fixed  $a$ . It is a convex combination of  $\eta(a, b)$  and of  $b$ . Now, for a fixed  $a \in [0, 1]$ ,  $b \mapsto \eta(a, b)$  is a convex piecewise-linear function: it is linear and decreasing over  $[0, a]$  and linear and increasing over  $[a, 1]$ , as can be verified from the definition of  $\eta$  (see Figure 1 (left) for illustration). Since by Eq. (5),  $\alpha_g^1$  is linear in  $\alpha_g^0$ , it follows that  $\rho(\alpha_g^0)$  is convex and piecewise-linear, with inflection points at  $\alpha_g^0 = \alpha^0 =: p_1$ , and at  $\alpha_g^1 = \alpha^1$ , that is at  $\alpha_g^0 = (\alpha^1 - r_g)/q_g =: p_2$  (see Figure 8 for illustration). It follows that the minimizer of  $\tau(\alpha_g^0)$  must be one of  $p_1, p_2$  or the end points of  $\text{dom}_g$ . These are exactly the values in  $S_g(\bar{\alpha})$  defined in Theorem 4.1.  $\square$

Next, we show that the set of possible minimizers for  $\text{Obj}_2$  can be reduced to a finite family of one-dimensional solution sets. We note that since  $\text{Obj}_2$  is only two-dimensional, a straight-forward approach to minimizing it might be to run a grid search over  $[0, 1]^2$  at some fixed resolution. However, when data is severely unbalanced, as in the case of cancer occurrence statistics, which we study in Section 5, the necessary grid size can be very large, and squaring this number can make the grid size infeasible. For instance, cancer occurrence statistics can be of the order  $10^{-6}$ . A two-dimensional grid of this resolution would be of order  $10^{12}$ , leading to a possibly impractical search size.

We start with the observation that each of the functions  $s_g^i(\bar{\alpha})$  is continuous in  $\alpha^0, \alpha^1$ . Thus,  $\text{Obj}_2$  can be redefined using continuous functions. Define

$$\begin{aligned} \forall g \in \mathcal{G}^+, i \in [4], \quad f_g^i(\bar{\alpha}) &:= \\ \left\{ \begin{array}{ll} \pi_g^0 \tau(\alpha^0, s_g^i(\bar{\alpha})) + \pi_g^1 \tau(\alpha^1, r_g + q_g s_g^i(\bar{\alpha})) & s_g^i(\bar{\alpha}) \in \text{dom}_g, \\ \infty & \text{otherwise.} \end{array} \right. \end{aligned} \quad (11)$$

In addition, for  $g \in \mathcal{G} \setminus \mathcal{G}^+$ , define

$$f_g^1(\bar{\alpha}) := \sum_{y: \pi_g^y=1} w_g \tau(\alpha^y, 1 - \hat{p}_g^y),$$

and  $f_g^i := \infty$  for  $i \in \{2, 3, 4\}$ . Then, it easily follows that

$$\text{Obj}_2(\bar{\alpha}) = \sum_{g \in \mathcal{G}^+} w_g \min_{i \in [4]} f_g^i(\bar{\alpha}).$$

The following lemma shows that each of the functions  $f_g^i$  is concave in  $\alpha^1$  on an appropriate split of its domain. A technical detail is that in some cases,  $f_g^i(\bar{\alpha})$  might not be continuous in  $\alpha^1$  at  $\alpha^1 = 0$  or at  $\alpha^1 = 1$ . This occurs because for  $b \in \{0, 1\}$ , we have  $1 = \lim_{a \rightarrow b} \eta(a, b) \neq \eta(b, b) = 0$ . Thus, in some cases the concavity holds on a restricted domain, which does not include 0 or 1.

**Lemma B.2.** Fix  $\alpha^0 \in [0, 1]$ . For  $g \in \mathcal{G}$ ,  $i \in [4]$ , consider the function  $\alpha^1 \mapsto f_g^i(\alpha^0, \alpha^1)$  and the domain  $I_g^i$  on which it is finite. Define  $\theta_g^i(\alpha^0)$  as follows:

$$\theta_g^i(\alpha^0) = \begin{cases} \max\{r_g, 0\} & i = 1, g \in \mathcal{G}^+; \\ \min\{r_g + q_g, 1\} & i = 2, g \in \mathcal{G}^+; \\ r_g + q_g \alpha^0 & i \in \{3, 4\}, g \in \mathcal{G}^+, \\ & \alpha^0 \in \text{dom}_g; \\ 1 - \hat{p}_g^1 & i = 1, g \in \mathcal{G}, \pi_g^1 = 1; \\ 0 & \text{otherwise.} \end{cases}$$

Then  $\alpha^1 \mapsto f_g^i(\alpha^0, \alpha^1)$  is concave on each of the intervals  $(0, \theta_g^i(\alpha^0)] \cap I_g^i$  and  $[\theta_g^i(\alpha^0), 1) \cap I_g^i$ . Moreover, if  $\theta_g^i(\alpha^0) \in (0, 1)$ , then this holds also for the closed intervals.

*Proof.* For given  $g \in \mathcal{G}$ ,  $i \in [4]$ , define  $v^0 := s_g^i(\bar{\alpha})$ , and  $v^1 := r_g + q_g v^0$ . First, let  $i \in [3]$ ,  $g \in \mathcal{G}^+$ , and assume  $s_g^i(\alpha^0) \in \text{dom}_g$ . In this case,  $f_g^i(\bar{\alpha}) = \pi_g^0 \tau(\alpha^0, v^0) + \pi_g^1 \tau(\alpha^1, v^1)$ . Observe that  $s_g^1, s_g^2, s_g^3$  are constant in  $\alpha^1$ , thus  $v^0$  does not depend on  $\alpha^1$ , and the same holds for  $\tau(\alpha^0, v^0)$ . Therefore, from the definition of  $\tau$ , the function  $\alpha^1 \mapsto f_g^i(\bar{\alpha})$  is an affine function of  $\eta(\alpha^1, v^1)$  (with non-negative coefficients). Note that  $v^1$  does not depend on  $\alpha^1$ . It is easy to verify that for any fixed  $v^1 \in (0, 1)$ ,  $\alpha^1 \mapsto \eta(\alpha^1, v^1)$  is concave on the interval  $[0, v^1]$  and on the interval  $[v^1, 1]$  (see illustration in Figure 1 (right)). Therefore,  $\alpha^1 \mapsto f_g^i(\bar{\alpha})$  is also concave on the same intervals. Substituting  $v^1$  with its definition, we get  $\theta_g^i(\alpha^0)$  as defined above. If  $v^1 \in \{0, 1\}$  then the function is concave on  $(0, v^1]$  and on  $[v^1, 1)$ .

Next, consider  $i = 4$ ,  $g \in \mathcal{G}^+$ . Note that we have  $I_g^4 = [r_g, r_g + q_g] \cap [0, 1]$ , since  $\alpha^1 \in I_g^4$  iff  $v^0 \equiv s_g^4(\alpha^1) \in \text{dom}_g$ . In this case, we have  $v^1 = \alpha^1$ , thus  $\eta(\alpha^1, v^1) = 0$  and so  $\tau(\alpha^1, v^1)$  is linear in  $\alpha^1$ . In addition,  $\tau(\alpha^0, v^0)$  is an affine function of  $\eta(\alpha^0, v^0) = \eta(\alpha^0, (\alpha^1 - r_g)/q_g)$ . This function

is linear in  $\alpha^1$  on each of the intervals  $[0, r_g + q_g \alpha^0] \cap I_g^i$  and  $[r_g + q_g \alpha^0, 1] \cap I_g^i$ . Thus,  $\alpha^1 \mapsto f_g^4(\bar{\alpha})$  is linear on each of these intervals.

Lastly, consider  $g \in \mathcal{G} \setminus \mathcal{G}^+$ . In this case, only  $i = 1$  is finite. If  $\pi_g^0 = 1$ , then  $\alpha^1 \mapsto f_g^1(\bar{\alpha})$  is constant. If  $\pi_g^1 = 1$ , then  $f_g^1$  is an affine function with positive coefficients of  $\eta(\alpha^1, 1 - \hat{p}_g^1)$ . Similarly to the first case, this implies that  $\alpha^1 \mapsto f_g^1(\bar{\alpha})$  is concave on  $[0, 1 - \hat{p}_g^1]$  and on  $[1 - \hat{p}_g^1, 1]$ .  $\square$

From the concavity property proved in Lemma B.2, we can conclude that it is easy to minimize  $\text{Obj}_2(\bar{\alpha})$  over  $\alpha^1$  when  $\alpha^0$  is fixed, since there is only a small finite number of solutions. This is proved in the following lemma.

**Lemma B.3.** Let  $\alpha^0 \in [0, 1]$ , and define  $\Theta(\alpha^0) := \{\theta_g^i(\alpha^0)\}_{g \in \mathcal{G}, i \in [4]} \cup \{0, 1\}$ . Then,

$$\min_{\alpha^1 \in [0, 1]} \text{Obj}_2(\bar{\alpha}) = \min_{\alpha^1 \in \Theta(\alpha^0)} \text{Obj}_2(\bar{\alpha}).$$

*Proof.* Fix  $\alpha^0$ . Ordering the points in  $\Theta(\alpha^0)$  in an ascending order and naming them  $0 = p_1 < p_2 < \dots < p_N = 1$ , where  $N = |\Theta(\alpha^0)|$ , define the set of intervals  $\mathcal{I} = \{[p_i, p_{i+1}] \setminus \{0, 1\}\}_{i \in [N-1]}$ . Observe that the intervals in  $\mathcal{I}$  partition  $(0, 1)$  (with overlaps at end points). Moreover, for all  $g \in \mathcal{G}^+$ ,  $i \in [4]$ , each of the intervals  $I \in \mathcal{I}$  satisfies either  $I \subseteq (0, \theta_g^i(\alpha^0)] \cap I_g^i$  or  $I \subseteq [\theta_g^i(\alpha^0), 1) \cap I_g^i$ . By Lemma B.2, it follows that for all  $g \in \mathcal{G}^+$ ,  $i \in [4]$ ,  $\alpha^1 \mapsto f_g^i(\bar{\alpha})$  is concave on  $I$ .

$\text{Obj}_2$  is a conic combination of minima of concave functions on  $I$ , thus it is concave on  $I$ . Thus, on each  $I \in \mathcal{I}$  which is a closed interval (that is, with endpoints other than 0 or 1),  $\text{Obj}_2(\bar{\alpha})$  is minimized by one of the endpoints of  $I$ . Now, consider  $I$  with an endpoint 0 or 1. For simplicity, assume  $I = (0, p_2]$ ; the other case is symmetric.  $\text{Obj}_2(\bar{\alpha})$  is concave on  $I$ . Thus, it is either minimized on  $I$  at  $p_1$  or satisfies  $\lim_{\alpha^1 \rightarrow 0} \text{Obj}_2(\bar{\alpha}) \leq \inf_{\alpha^1 \in I} \text{Obj}_2(\bar{\alpha})$ . In the latter case, there are two options: if  $\alpha^1 \mapsto \text{Obj}_2(\bar{\alpha})$  is continuous at 0, then  $\text{Obj}_2(\alpha^0, 0) = \lim_{\alpha^1 \rightarrow 0} \text{Obj}_2(\bar{\alpha})$ , implying that the function is minimized on  $I$  by  $\alpha^1 = 0$ . If it is not continuous at 0, this can only happen if  $r_g + q_g s_g^i(\bar{\alpha}) = 0$ , which leads to  $\eta(\alpha^1, r_g + q_g s_g^i(\bar{\alpha})) = 0$ , whereas  $\lim_{\alpha^1 \rightarrow 0} \eta(\alpha^1, r_g + q_g s_g^i(\bar{\alpha})) = 1$ . Thus, in this case,  $\text{Obj}_2(\alpha^0, 0) \leq \lim_{\alpha^1 \rightarrow 0} \text{Obj}_2(\bar{\alpha})$ . It follows that in this case as well,  $\text{Obj}_2$  is minimized on  $I$  by 0.

It follows that the minimizer of  $\alpha^1 \mapsto \text{Obj}_2(\bar{\alpha})$  must be one of the end points of  $\Theta(\alpha^0)$ , as claimed.  $\square$

Now, due to the complete symmetry of the problem definition between the two labels, Lemma B.3 implies also the symmetric property, that for a fixed  $\alpha^1 \in [0, 1]$ ,  $\min_{\alpha^0 \in [0, 1]} \text{Obj}_2(\bar{\alpha}) = \min_{\alpha^0 \in \bar{\Theta}(\alpha^1)} \text{Obj}_2(\bar{\alpha})$ , where  $\bar{\Theta}$  is symmetric to  $\Theta$  and is obtained by switching the roles of

$y = 1$  and  $y = 0$  in all definitions. By explicitly calculating the resulting values, we get that

$$\begin{aligned}\tilde{\Theta}(\alpha^1) &= V_0 \cup \{(\alpha^1 - r_g)/q_g\}_{g \in \mathcal{G}^+}, \\ \Theta(\alpha^0) &= V_1 \cup \{r_g + q_g \alpha^0\}_{g \in \mathcal{G}^+},\end{aligned}$$

Where  $V_0, V_1$  are defined as in Theorem 4.1. Using the above results, we can now prove Theorem 4.1.

*Proof of Theorem 4.1.* From Lemma B.1, we have that  $V^* = \min_{\bar{\alpha} \in [0,1]^2} \text{Obj}_2(\bar{\alpha})$ . Thus, we have left to show that there exists a minimizer for  $\text{Obj}_2(\bar{\alpha})$  in the set **Sols** defined in Theorem 4.1. From Lemma B.3, it follows that there exists a minimizing solution  $(a^0, a^1) \in \text{argmin}_{\bar{\alpha} \in [0,1]^2} \text{Obj}_2(\bar{\alpha})$  such that  $a^1 \in \Theta(a^0)$ . The symmetric counterpart of Lemma B.3 implies that there exists some  $b^0 \in \tilde{\Theta}(a^1)$  such that  $(b^0, a^1) \in \text{argmin}_{\bar{\alpha} \in [0,1]^2} \text{Obj}_2(\bar{\alpha})$ . Thus, at least one of the following options must hold:

- $(b^0, a^1) \in V_0 \times V_1$ .
- $a^1 \notin V_1$ ; this implies that  $a^1 = r_g + q_g a^0$  for some  $g \in \mathcal{G}^+$ .
- $b^0 \notin V_0$ ; this implies that  $b^0 = (a^1 - r_g)/q_g$  for some  $g \in \mathcal{G}^+$ .

In the first case, there exists a minimizer in  $V_0 \times V_1$ . In the second and third case, there exists a minimizer in the set  $\{(v, r_g + q_g v) \mid v \in [0, 1], g \in \mathcal{G}^+\}$ . Thus, in all cases there is a minimizer in the set **Sols**, as required.  $\square$
